# Supplementary material for: A New Strain of Lecanicillium uredinophilum Isolated from Tibetan Plateau and Its Insecticidal Activity
Source: MDPI journal article supplement (doi:10.3390/microorganisms10091832), 2022-09-14
Supplement: s1 [file s1]

Supplementary material S2 Specimen information and GenBank accession number for strains used in this study

| Species                                               | Voucher information | GenBank accession number |              |                        |                        |            |
|-------------------------------------------------------|---------------------|--------------------------|--------------|------------------------|------------------------|------------|
|                                                       |                     | <i>nrLSU</i>             | <i>nrSSU</i> | <i>RPB<sub>1</sub></i> | <i>RPB<sub>2</sub></i> | <i>ITS</i> |
| <i>Lecanicillium uredinophilum</i>                    | QHLA                | MZ768916                 | MZ768917     | ON107271               | ON107270               | MZ768909   |
| <i>Lecanicillium acerosum</i>                         | CBS418.81           | KM283786                 | KM283762     | KM283832               | KM283852               | EF641893   |
| <i>Lecanicillium antillanum</i>                       | CBS350.85           | AF339536                 | AF339585     | DQ522396               | DQ522450               | AJ292392   |
| <i>Lecanicillium aphanocladii</i>                     | CBS797.84           | KM283787                 | KM283763     | KM283833               | KM283853               | -          |
| <i>Lecanicillium aphanocladii</i>                     | GZUIFR-lun1505      | MN944423                 | MN963920     | MT006062               | MT006067               | MN944448   |
| <i>Lecanicillium araneorum</i>                        | CBS726.73a          | AF339537                 | AF339586     | EF468887               | EF468934               | AJ292464   |
| <i>Lecanicillium araneogenum</i>                      | GZU1032Lea          | KX845704                 | KX845706     | KX845670               | KX845702               | -          |
| <i>Lecanicillium attenuatum</i>                       | CBS402.78           | AF339565                 | AF339614     | EF468888               | EF468935               | AJ292434   |
| <i>Lecanicillium attenuatum</i>                       | GZUIFR-lun1405      | MN944422                 | MN963919     | MTT006061              | MT006066               | MN944447   |
| <i>Lecanicillium attenuatum</i>                       | KACC42493           | KM283780                 | KM283756     | KM283826               | KM283846               | -          |
| <i>Lecanicillium cauligalbarum</i>                    | GZUIFR-ZHJ02        | MH730664                 | MH730666     | MH801921               | MH801923               | MH801925   |
| <i>Lecanicillium dimorphum</i>                        | CBS345.37           | KM283788                 | KM283764     | KM283834               | KM283854               | -          |
| <i>Lecanicillium dimorphum</i>                        | CBS363.86           | AF339559                 | AF339608     | EF468890               | -                      | -          |
| <i>Lecanicillium flavidum</i>                         | CBS300.70D          | KM283789                 | KM283765     | -                      | KM283855               | EF641877   |
| <i>Lecanicillium fungicola</i> var. <i>aleophilum</i> | CBS357.80           | KM283791                 | KM283767     | KM283335               | KM283856               | NR111064   |
| <i>Lecanicillium fungicola</i> var. <i>fungicola</i>  | CBS992.69           | KM283792                 | KM283768     | -                      | KM283857               | NR119653   |
| <i>Lecanicillium fusisporum</i>                       | CBS164.70           | KM283793                 | KM283769     | KM283836               | KM283858               | AJ292428   |
| <i>Lecanicillium lecanii</i>                          | CBS101247           | KM283794                 | KM283770     | KM283337               | KM283859               | JN049836   |
| <i>Lecanicillium lecanii</i>                          | CBS101267           | KM283795                 | KM283771     | KM283838               | KM283860               | -          |
| <i>Lecanicillium longisporum</i>                      | CBS102072           | KM283796                 | KM283772     | KM283839               | KM283861               | -          |
| <i>Lecanicillium longisporum</i>                      | CBS126.27           | KM283797                 | KM283773     | KM283840               | KM283862               | -          |
| <i>Lecanicillium muscarium</i>                        | CBS143.62           | KM283798                 | KM283774     | KM283841               | KM283863               | -          |
| <i>Lecanicillium pissodis</i>                         | CBS118231           | KM283799                 | KM283775     | KM283842               | KM283864               | -          |
| <i>Lecanicillium psalliotae</i>                       | CBS532.81           | AF339560                 | AF339609     | EF469096               | EF469112               | JN049846   |
| <i>Lecanicillium sabanense</i>                        | JCHA5               | KC875225                 | KC633251     |                        | KC633249               | KC633232   |
| <i>Lecanicillium</i> sp.                              | GZUIFR-lun1403      | MN944420                 | MN963917     | MT006059               | MT006064               | MN944446   |
| <i>Lecanicillium subprimulinum</i>                    | HKAS99548           | MG585315                 | MG585316     | -                      | -                      | MG585314   |
| <i>Lecanicillium subprimulinum</i>                    | HKAS99548           | MG585319                 | MG585320     | -                      | -                      | MG585318   |
| <i>Lecanicillium tenuioes</i>                         | CBS309.85           | KM283802                 | KM283778     | KM283844               | KM283866               | JN036556   |
| <i>Lecanicillium uredinophilum</i>                    | KACC47756           | KM283783                 | KM283759     | KM283829               | KM283849               | -          |
| <i>Lecanicillium wallacei</i>                         | CBS101237           | AY184967                 | AY184978     | EF469102               | EF469119               | -          |
| <i>Alternaria abundans</i>                            | CBS534.83           | MH873354                 | MH861640     | -                      | KC584448               | MH861639   |

—: no nitrogen.
